# Supplementary material for: Type I T cells sensitize treatment refractory tumors to chemotherapy through inhibition of oncogenic signaling pathways
Source: PubMed Central journal article supplement — J Immunother Cancer. 2021 Mar 24;9(3):e002355. doi: 10.1136/jitc-2021-002355 (PMC7993179; doi:10.1136/jitc-2021-002355), 2021-03-24
Supplement: jitc-2021-002355supp004.pdf [file jitc-2021-002355supp004.pdf]

**Supplementary Figure S1.** IGF-IR vaccination induces IFN- $\gamma$  secreting Th1 cells and inhibits tumor growth. (A) Mean IFN- $\gamma$  spots per well (SPW $\pm$ SEM) from mice immunized with IGF-IR MHC class II epitopes. Experimental groups include unstimulated cells and cells stimulated with a negative control peptide (HIVp52) or IGF-IR peptides; \*\* $p < 0.01$ . (B) Mean tumor volume (mm<sup>3</sup> $\pm$ SEM) from mice immunized with the indicated treatment; \*\*\*\* $p < 0.0001$ . (C) Levels (pg/ml) of the indicated cytokine secreted from T-cells from vaccinated mice after stimulation with IGF-IR epitopes; \* $p < 0.05$ , \*\* $p < 0.01$ .

**Supplementary Figure S2.** IFN- $\gamma$ R1 is expressed on murine mammary tumor cells. Representative flow cytometry histograms of (A) MMC or (B) M6 cells stained with isotype control (gray peak) or IFN- $\gamma$ R1 (green peak).

**Supplementary Figure. S3** Tumor cell growth after treatment with IFN- $\gamma$  is dependent on SOCS1. (A) Representative immunocytochemistry and (B) quantification of tumor cells probing for PCNA on untreated cells or cells treated with IFN- $\gamma$  after transfection with control siRNA or SOCS1 siRNA. (C) Representative immunocytochemistry and (D) quantification of tumor cells probing for TUNEL on untreated cells or cells treated with IFN- $\gamma$  after transfection with control siRNA or SOCS1 siRNA  $n = 3$  independent experiments; \*\*\*\* $p < 0.0001$ . siRNA: small interfering RNA, control siRNA: control siRNA.
