# Supplementary figures and images for: Type I T cells sensitize treatment refractory tumors to chemotherapy through inhibition of oncogenic signaling pathways
Source: PubMed Central journal article supplement — J Immunother Cancer. 2021 Mar 24;9(3):e002355. doi: 10.1136/jitc-2021-002355 (PMC7993179; doi:10.1136/jitc-2021-002355), 2021-03-24

**A**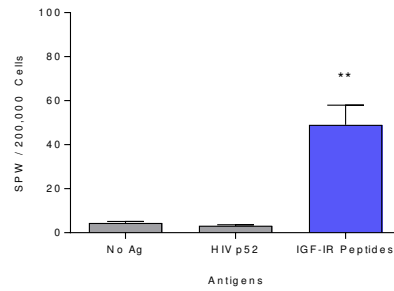**B**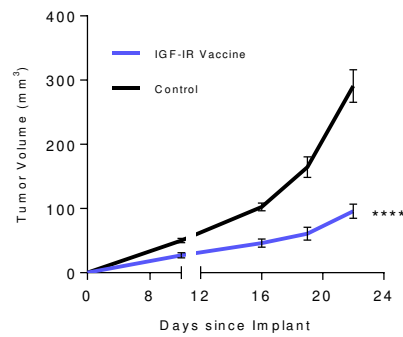**C**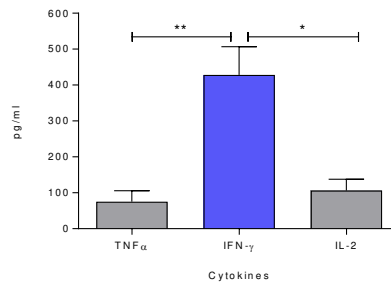

Supplementary Figure S1

Supplement: jitc-2021-002355supp001.pdf [file jitc-2021-002355supp001.pdf]

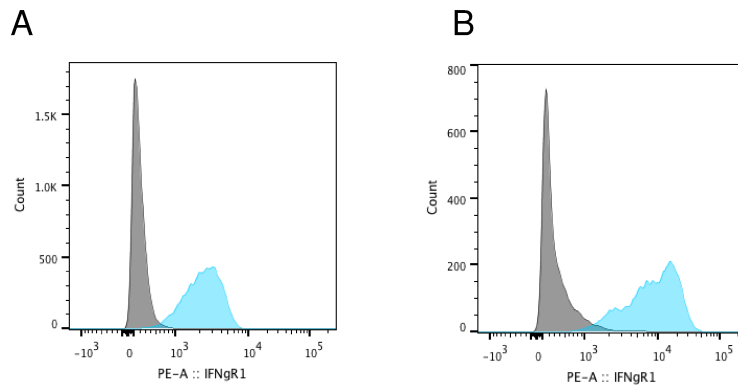**Supplementary Figure S2**

Supplement: jitc-2021-002355supp002.pdf [file jitc-2021-002355supp002.pdf]

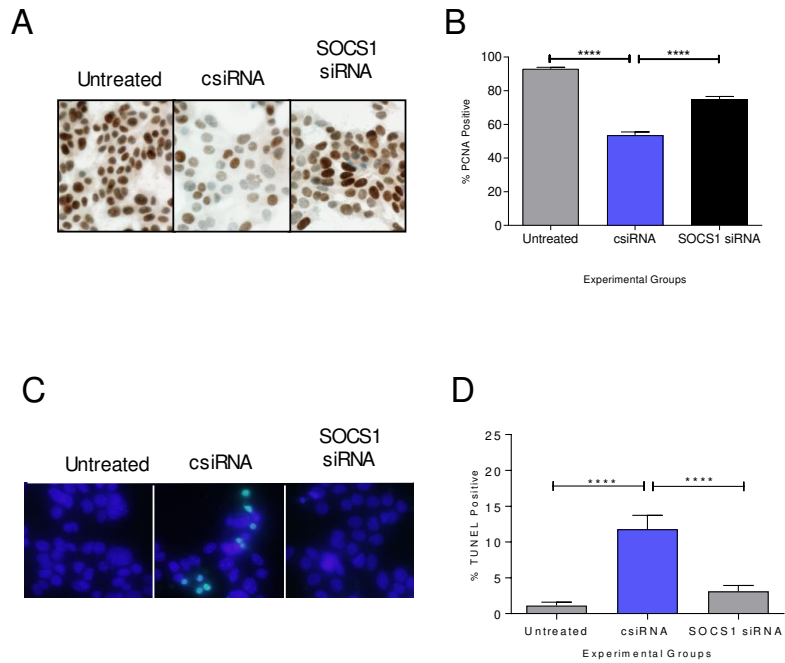

Supplementary Figure S3

Supplement: jitc-2021-002355supp003.pdf [file jitc-2021-002355supp003.pdf]
